# Supplementary material for: Revealing the Effect of Heat Treatment on the Spectral Pattern of Unifloral Honeys Using Aquaphotomics
Source: MDPI journal article supplement (doi:10.3390/molecules27030780), 2022-01-25
Supplement: s1 [file s1]

**Table S1.** Results of the partial least square regression models built for the prediction of time interval within temperature group and temperature within time intervals

| Detailed temperature level prediction models |                |                         |      |       |                   |       |      |                   |        |       |
|----------------------------------------------|----------------|-------------------------|------|-------|-------------------|-------|------|-------------------|--------|-------|
|                                              | Subgroup       | Pretreatment            | NrLV | NrObs | R <sup>2</sup> Tr | RMSEC | RPDC | R <sup>2</sup> CV | RMSECV | RPDCV |
| Sunflower                                    | within 60 min  | sgol@2-17-0_deTr        | 5    | 160   | 0.93              | 7.09  | 3.89 | 0.89              | 9.25   | 2.98  |
|                                              | within 120 min | sgol@2-21-0_sgol@2-17-2 | 5    | 157   | 0.87              | 9.85  | 2.80 | 0.82              | 11.76  | 2.35  |
|                                              | within 180 min | sgol@2-17-0_deTr_snv    | 5    | 160   | 0.94              | 6.72  | 4.08 | 0.90              | 8.59   | 3.19  |
|                                              | within 240 min | sgol@2-21-0_deTr_msc    | 5    | 149   | 0.96              | 5.63  | 4.76 | 0.94              | 6.78   | 3.96  |
| Bastard indigo                               | within 60 min  | sgol@2-21-0_snv         | 5    | 165   | 0.84              | 10.60 | 2.54 | 0.77              | 13.00  | 2.07  |
|                                              | within 120 min | sgol@2-13-0_msc         | 5    | 159   | 0.86              | 9.97  | 2.66 | 0.77              | 12.58  | 2.11  |
|                                              | within 180 min | snv                     | 5    | 169   | 0.89              | 8.84  | 3.05 | 0.76              | 13.03  | 2.07  |
|                                              | within 240 min | sgol@2-13-0_sgol@2-13-2 | 5    | 139   | 0.92              | 7.51  | 3.60 | 0.88              | 9.35   | 2.89  |
| Acacia                                       | within 60 min  | sgol@2-17-0_msc         | 5    | 156   | 0.79              | 12.44 | 2.18 | 0.68              | 15.36  | 1.77  |
|                                              | within 120 min | sgol@2-21-0             | 5    | 154   | 0.73              | 13.65 | 1.94 | 0.65              | 15.65  | 1.69  |
|                                              | within 180 min | sgol@2-17-0_deTr_msc    | 5    | 149   | 0.51              | 19.20 | 1.43 | 0.29              | 23.13  | 1.19  |
|                                              | within 240 min | sgol@2-13-0_sgol@2-13-1 | 5    | 162   | 0.73              | 13.52 | 1.94 | 0.60              | 16.52  | 1.59  |
| Detailed time-period prediction models       |                |                         |      |       |                   |       |      |                   |        |       |
|                                              | Subgroup       | Pretreatment            | NrLV | NrObs | R <sup>2</sup> Tr | RMSEC | RPDC | R <sup>2</sup> CV | RMSECV | RPDCV |
| Sunflower                                    | within 40 °C   | sgol@2-17-0_deTr_msc    | 5    | 171   | 0.98              | 11.62 | 7.32 | 0.97              | 14.49  | 5.87  |
|                                              | within 60 °C   | sgol@2-21-0_sgol@2-17-2 | 5    | 151   | 0.91              | 26.31 | 3.28 | 0.83              | 35.17  | 2.46  |
|                                              | within 80 °C   | sgol@2-13-0_deTr        | 5    | 155   | 0.88              | 28.83 | 2.93 | 0.83              | 34.42  | 2.45  |
|                                              | within 100 °C  | sgol@2-17-0_sgol@2-21-1 | 5    | 165   | 0.91              | 24.56 | 3.41 | 0.89              | 27.84  | 3.00  |
| Bastard indigo                               | within 40 °C   | sgol@2-13-0_deTr_snv    | 4    | 156   | 0.96              | 17.24 | 4.94 | 0.94              | 20.60  | 4.13  |
|                                              | within 60 °C   | sgol@2-13-0             | 1    | 181   | 0.55              | 58.12 | 1.49 | 0.46              | 63.75  | 1.36  |
|                                              | within 80 °C   | sgol@2-13-0             | 3    | 167   | 0.54              | 56.96 | 1.47 | 0.42              | 63.60  | 1.32  |
|                                              | within 100 °C  | sgol@2-17-0_snv         | 5    | 148   | 0.92              | 24.62 | 3.46 | 0.87              | 30.27  | 2.81  |
| Acacia                                       | within 40 °C   | sgol@2-21-0_sgol@2-21-1 | 5    | 162   | 0.61              | 53.44 | 1.61 | 0.50              | 60.59  | 1.42  |
|                                              | within 60 °C   | sgol@2-21-0_sgol@2-17-2 | 4    | 160   | 0.61              | 53.96 | 1.60 | 0.47              | 62.59  | 1.38  |
|                                              | within 80 °C   | sgol@2-21-0             | 5    | 158   | 0.79              | 39.47 | 2.16 | 0.67              | 49.02  | 1.74  |
|                                              | within 100 °C  | sgol@2-21-0_sgol@2-13-1 | 5    | 145   | 0.87              | 30.71 | 2.76 | 0.83              | 34.62  | 2.45  |

Each row represents the best model chosen from the 41 pretreatment combinations, model parameters are computed using leave-one-sample-out cross-validation

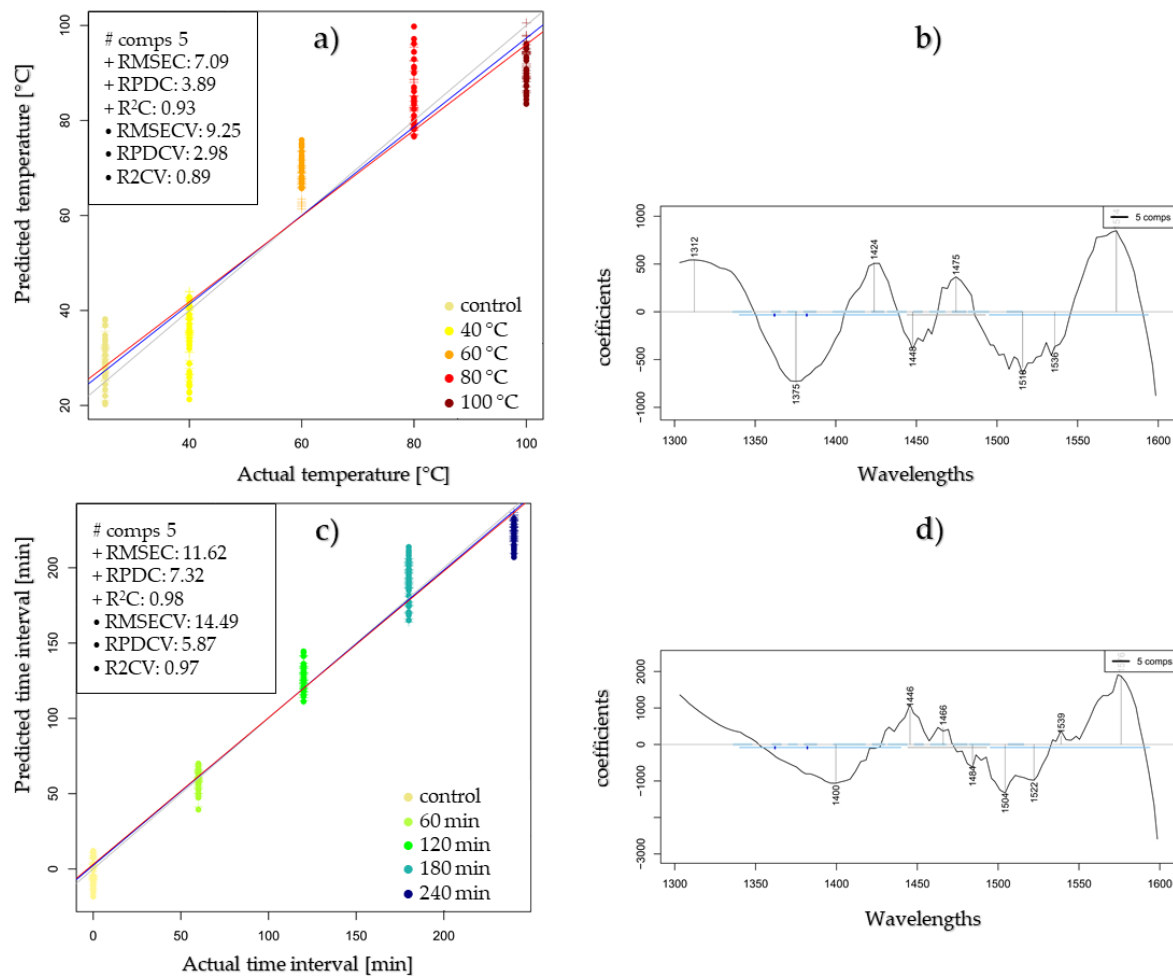

**Figure S1:** Partial least square regression plot of the sunflower honeys: **a)** regression plot of honeys heated for 60 min regressed on the temperature levels with Savitzky–Golay smoothing (window size: 17) and detrending; **b)** the respective regression vector; **c)** regression plot of honeys heated at 40 °C regressed on the time intervals with Savitzky–Golay smoothing (window size: 17), detrending, and MSC; **d)** the respective regression vector.
